# Supplementary material for: Abnormal CYP11A1 gene expression induces excessive autophagy, contributing to the pathogenesis of preeclampsia
Source: PubMed Central journal article supplement (PMC5685712; doi:10.18632/oncotarget.21158), 2017-09-22
Supplement: oncotarget-08-89824-s001.pdf [file oncotarget-08-89824-s001.pdf]

## Abnormal CYP11A1 gene expression induces excessive autophagy, contributing to the pathogenesis of preeclampsia

### SUPPLEMENTARY MATERIALS

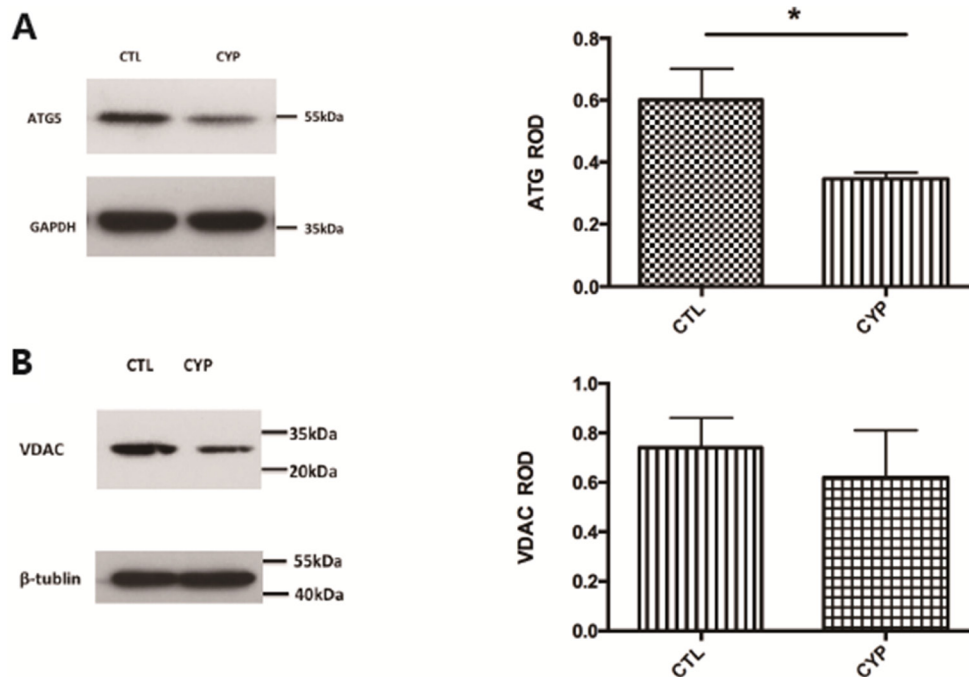

**Supplementary Figure 1:** (A, B) Western blot shows that ATG5 and VDAC1 expression are suppressed in CYP11A1 overexpression BeWo cells. \* means  $P < 0.05$ .

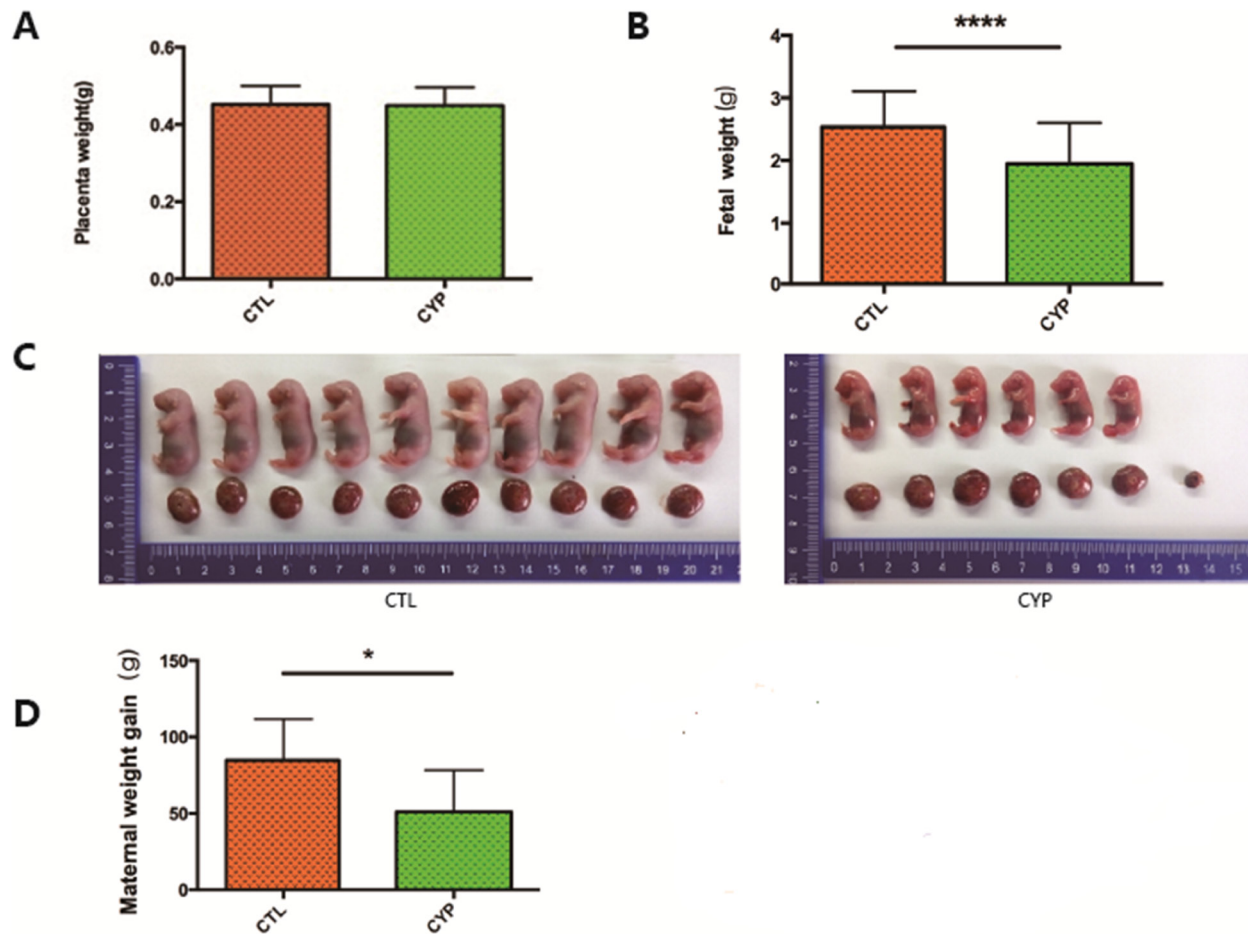

**Supplementary Figure 2: *In vivo* overexpression of CYP11A1 leads to decreased placenta, fetal weight and reduced maternal weight gain in rats.** (A) Placenta weight shows significant decrease after overexpression of CYP11A1. (B, C) Offspring weights shows significant decrease after overexpression of CYP11A1. (D) Overexpression of CYP11A1 Rats' maternal weight gain from GD 0.5 to GD 19.5 is significant lower than the control group. \* means  $P < 0.05$ , \*\* means  $P < 0.01$ , \*\*\* means  $P < 0.001$ , \*\*\*\* means  $P < 0.0001$ .

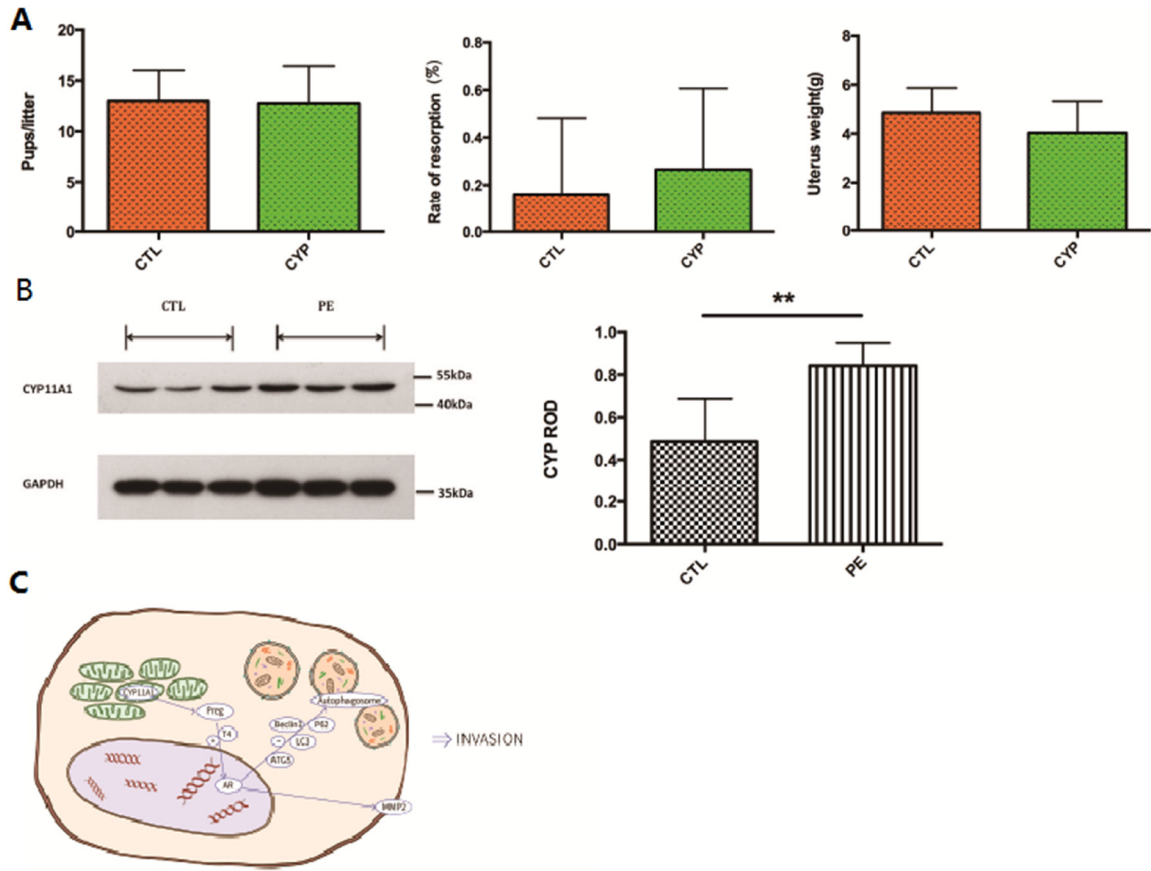

**Supplementary Figure 3:** (A) Pregnancy loss and fetal number shows modest decrease after overexpression of CYP11A. (B) Western blot result shows that the expression of CYP11A1 is significantly increased in placenta of preeclampsia patients ( $N = 24$  for control group;  $N = 24$  for PE group); (C) The diagram shows the proposed mechanism of how overexpressed CYP11A1 leading to compromised trophoblast invasion, therefore contributing preeclampsia pathogenesis. Over-activated CYP11A1 increases androgen production, which stimulate androgen receptor (AR) transcriptional activity. Androgen receptor (AR) could then activate the expression of mitophagy related proteins, including LC-3, Beclin 1, P62, et. al. The excessive mitophagy inhibits the trophoblast invasion through regulating MMP2 expression.

**Supplementary Table 1: Clinical characteristics of patients in the current study**

|                                                   | <b>Healthy pregnant (n = 24)</b> | <b>Preeclampsia (n = 24)</b> | <b>P value</b> | <b>P significant</b> |
|---------------------------------------------------|----------------------------------|------------------------------|----------------|----------------------|
| Age (years old)                                   | 30.02 ± 0.6790                   | 32.34 ± 1.209                | 0.1021         | ns                   |
| gestational age (weeks) at end of pregnant        | 39.79 ± 0.1836                   | 34.98 ± 0.9715               | < 0.0001       | ****                 |
| number of parity                                  | 1.417 ± 0.1797                   | 2.792 ± 0.2885               | 0.0002         | ***                  |
| number of gestation                               | 1.083 ± 0.05763                  | 1.292 ± 0.1123               | 0.0723         | ns                   |
| fetal weight (g)                                  | 3358 ± 61.45                     | 2264 ± 263.5                 | 0.0005         | ***                  |
| fetal length (cm)                                 | 49.79 ± 0.2169                   | 43.45 ± 1.724                | 0.0016         | **                   |
| placenta weight (g)                               | 601.2 ± 21.77                    | 431.3 ± 34.57                | 0.0001         | ***                  |
| BMI at beginning of pregnant (kg/m <sup>2</sup> ) | 20.25 ± 0.4121                   | 22.49 ± 0.8989               | 0.0403         | *                    |
| BMI at deliver (kg/m <sup>2</sup> )               | 25.44 ± 0.3993                   | 28.08 ± 0.8163               | 0.0071         | **                   |
| SPB (mm/Hg)                                       | 110.4 ± 1.340                    | 149.2 ± 3.468                | < 0.0001       | ****                 |
| DPB (mm/Hg)                                       | 67.59 ± 2.460                    | 95.45 ± 2.230                | < 0.0001       | ****                 |
